# Supplementary material
Source: publisher figshare collection journal article supplement (https://tandf.figshare.com/ndownloader/files/1902438)
Supplement: Supplementary file 1 [file 1902438]

**Supplementary Table 1**

Number and ratio of male (M) and female (F) *Paphies ventricosa* from Site A collected during 2011, and from four sites along Oteri Beach, New Zealand at four times in 2012. χ-test values of the comparison between the observed sex ratio and anexpected 1:1 (M:F) sex ratio are indicated for each population and for thepooled populations. P-values based on 1 degree of freedom.

|  | Males | Females | Ratio (M:F) | **χ**2-values | Significance |
| --- | --- | --- | --- | --- | --- |
| Site B (2011) | 103 | 93 | 1.11 | 0.510 | *P* = 0.475 |
|  |  |  |  |  |  |
| Site A (2012) | 44 | 32 | 1.38 | 1.895 | *P* = 0.168 |
| Site B (2012) | 41 | 29 | 1.41 | 2.057 | *P* = 0.152 |
| Site C (2012) | 44 | 35 | 1.26 | 1.025 | *P* = 0.311 |
| Site D (2012) | 38 | 39 | 0.97 | 0.013 | *P* = 0.909 |
| Sites Pooled (2012) | 304 | 264 | 1.15 | 2.817 | *P* = 0.093 |
